# Supplementary material for: Prevalence and risk factors of food insecurity during pregnancy: a multicenter survey in French Guiana
Source: Research Square preprint supplement (doi:10.21203/rs.3.rs-5462375/v1), 2025-03-31
Supplement: Supplementary file 1 [file 26ab34de99bef1d1d05f6be3.xlsx]

## Sheet: table 1
	Characteristics of women included (n=730)		%
	Age	<20 yr.	12.3
		20 to 35 yr.	67.2
		>35 yr.	20.5
	Administrative status	French citizen	46.1
		Foreign national with residence permit	24.8
		Foreign national without residence permit	19.5
		NK	9.6
	Length of stay in French Guiana (in terciles)	<8 yr	32.5
		8-21.9 yr	29.3
		22 yr and +	35.3
		NK	2.9
	Universal health insurance	Yes	64.9
		No	30.5
		NK	4.6
	Education level (started but not necessarily validated)	Before high school	13.9
		Over high school	84.6
		NK	1.4
	Social Support if needed	Yes	78.3
		No	21.7
	Lives with child's father (at the end of pregnancy)	Yes	63.0
		No	37.0
	Maternal self esteem (in tercile)	Low ( score <30)	22.7
		Medium or high (31-40)	55.7
		NK	16.6
	Antropometric measurements
	Preconception maternal BMI	Underweight (<18.5 kg/m²)	4.5
		Normal weight (18.5-24.9 kg/m²)	34.2
		Overweight (25.0-29.9 kg/m²)	21.8
		Obese (more than 30.0 kg/m²)	25.1
		NK	14.4
	GWG according to IOM (depending on maternal BMI)	as recommended	25.1
		Excessive	23.2
		Insuffisient	32.6
		NK	19.2
	Based on food recalls in the last 24 hours
	Minimum dietary diversity for women	<5 food groups	41.6
		5 or more food groups	45.6
		NK	12.8
	All-5 indicator	Not all 5 food groups	77.6
		All 5 food groups	9.6
		NK	12.8
