# Supplementary material for: Prevalence and risk factors of food insecurity during pregnancy: a multicenter survey in French Guiana
Source: Research Square preprint supplement (doi:10.21203/rs.3.rs-5462375/v1), 2025-03-31
Supplement: Supplementary file 2 [file 478e9000fb74bd4a16d1b1b6.xlsx]

## Sheet: table 2
Table 2. Household characteristics of pregnant women included in the NPTM study, 2023
	Household Characteristics		%
	Household localisation	Urban	78.4
		Rural	21.6
	Household Composition
	People in household	<5	59.0
		≥ 5	34.0
		NK	7.1
	Single-parent family	Yes	14.3
		No	78.6
		NK	7.1
	Children in Household	<3	65.1
		≥ 3	27.8
		NK	7.1
	Housing
	Home without electricity or running water	yes	16.2
		No	83.8
	With access to farm land (fruits, vegetables, tubers)	yes	22.4
		No	77.6
	Financial Capital
	At least 1 member with a declared source of income	Yes	48.6
		No	51.4
