# Supplementary material for: Prevalence and risk factors of food insecurity during pregnancy: a multicenter survey in French Guiana
Source: Research Square preprint supplement (doi:10.21203/rs.3.rs-5462375/v1), 2025-03-31
Supplement: Supplementary file 3 [file 4ca6a2727175ecd85445f8b4.xlsx]

## Sheet: additional files 2
	GWG according to 2019 IOM guidelines	depending on maternal BMI
		Underweight (<18.5 kg/m²)	Normal weight (18.5-24.9 kg/m²)	Overweight (25.0-29.9 kg/m²)	Obese (more than 30.0 kg/m²)	All
	Insuffisant (%)	56.1	42.7	27.4	37.7	32.6
	As recommended (%)	37.2	26.3	35.7	26.4	25.1
	Excessive (%)	6.7	24.3	31.3	30.8	23.2
	NK (%)	0.0	6.7	5.5	5.1	19.2
