# Supplementary material for: Prevalence and risk factors of food insecurity during pregnancy: a multicenter survey in French Guiana
Source: Research Square preprint supplement (doi:10.21203/rs.3.rs-5462375/v1), 2025-03-31
Supplement: Supplementary file 4 [file 56941f4dfb8aacea6fa5fbd5.xlsx]

## Sheet: table 3
		Food security	Food insecurity		Not adjusted
		%	%	p	Crude PR	95%CI	p
	Age (years)
	<20	12.8	11.1	0.30	0.9	[0.6-1.4]	0.76
	20 to 35	68.4	64.8		1 (Ref.)
	>35	18.8	24.1		1.2	[0.9-1.5]	0.12
	Administrative status
	French citizen	53.9	29.8	<0.01	1 (Ref.)
	Foreign national with residence permit	24.7	24.8		1.5	[1.1-2.1]	<0.01
	Foreign national without residence permit	12.4	34.3		2.7	[2.1-3.5]	<0.01
	NK	8.9	11.7		1.8	[1.2-2.7]	<0.01
	Length of stay in French Guiana (years; in tercile)
	<8	27.1	43.9	<0.01	1 (Ref.)
	8.0-21.9	29.8	28.1		0.7	[0.5-0.9]	<0.01
	≥ 22.0	40.7	23.9		0.5	[0.4-0.7]	<0.01
	NK	2.4	4.0		1.1	[0.6-1.8]	0.96
	Universal health insurance
	Yes	23.1	46.2	<0.01	0.5	[0.4-0.6]	<0.01
	No	72.6	48.6		1 (Ref.)
	NK	4.3	5.2		0.7	[0.4-1.3]	0.29
	Education level
	Before high school	88.4	76.6	<0.01	1.6	[1.3-2.1]	<0.01
	Over high school	10.7	20.6		1 (Ref.)
	NK	0.8	2.7		2.1	[1.2-3.6]	<0.01
	Social Support if needed
	Yes	84.8	64.7	<0.01	0.5	[0.4-0.6]	<0.01
	No	15.2	35.3		1 (Ref.)
	Lives with child's father
	Yes	35.6	39.9	0.28	0.9	[0.7-1.1]	0.27
	No	64.4	60.1		1 (Ref.)
	Maternal self esteem (score in tercile)
	Low (<30)	22.8	38.0	<0.01	1.8	[1.4-2.2]	<0.01
	Mediumor high (31-40)	61.7	43.1		1 (Ref.)
	NK	15.5	18.9		1.5	[1.1-2.0]	0.01
	Preconception BMI (kg/m²)
	<24.9	40.5	34.9	0.10	1 (Ref.)
	25.0-29.9	23.2	18.8		1.0	[0.7-1.3]	0.79
	≥ 30.0	23.1	29.2		1.3	[1.0-1.7]	0.06
	NK	13.2	17.0		1.3	[0.9-1.8]	0.10
	GWG
	as recommended	26.2	22.8	0.59	1 (Ref.)
	Excessive	23.8	21.9		1.0	[0.7-1.4]	0.35
	Insuffisient	31.9	34.0		1.1	[0.8-1.5]	0.82
	NK	18.2	21.4		1.2	[0.9-1.7]	0.22
	Minimum dietary diversity of Women
	<5 food groups	41.6	41.5	0.99	1 (Ref.)
	≥ 5 food groups	45.4	45.9		1.0	[0.8-1.3]	0.94
	NK	12.9	12.6		1.0	[0.7-1.5]	0.91
	All-5 indicator
	Not all 5 food groups	75.9	81.2	0.11	1 (Ref.)
	All 5 food groups	11.2	6.2		0.6	[0.4-1.0]	<0.05
	NK	12.9	12.6		0.9	[0.7-1.3]	0.70
	Household localisation
	Urban	76.4	82.6	0.07	1 (Ref.)
	Rural	23.6	17.4		0.8	[0.5-1.0]	0.08
	Number of people in the household
	<5	60.3	56.1	0.47	1 (Ref.)
	≥ 5	32.4	37.3		1.1	[0.1-1.4]	0.22
	NK	7.3	6.5		1.1	[0.6-1.6]	0.90
	Single-parent family
	Yes	11.8	19.6	0.03	1.4	[1.1-1.9]	<0.01
	No	80.9	73.9		1 (Ref.)
	NK	7.3	6.5		1.0	[0.6-1.6]	0.95
	Children in Household
	<3	67.7	59.7	0.07	1 (Ref.)
	≥ 3	25.0	33.8		1.3	[1.0-1.7]	0.02
	NK	7.3	6.5		1.0	[0.6-1.6]	0.976
	Electricity and running water at home
	Without	10.4	28.3	<0.01	2.0	[1.6-2.5]	<0.01
	With	89.6	71.7		1 (Ref.)
	With access to farm land (fruits, vegetables, tubers)
	yes	23.3	20.4	0.41	0.9	[0.7-1.2]	0.42
	No	76.7	79.5		1 (Ref.)
	At least 1 member with a declared source of income
	Yes	56.6	31.9	<0.01	0.5	[0.4-0.6]	<0.01
	No	43.4	68.1		1 (Ref.)
