# Supplementary material for: Prevalence and risk factors of food insecurity during pregnancy: a multicenter survey in French Guiana
Source: Research Square preprint supplement (doi:10.21203/rs.3.rs-5462375/v1), 2025-03-31
Supplement: Supplementary file 5 [file 7061987ef8fb5c57ff948c90.xlsx]

## Sheet: Table 4
	Factors associated with FI	Saturated Model			Parsimonious Model
		Adjusted PR	95%CI	p	Adjusted PR	95%CI	p
	Administrative status
	French citizen	1 (Ref.)			1 (Ref.)
	Foreign national with residence permit	1.3	[1.0-1.8]	0.10	1.4	[1.0-1.9]	0.03
	Foreign national without residence permit	1.9	[1.3-2.9]	<0.01	1.9	[1.4-2.6]	<0.01
	NK	1.2	[0.7-2.2]	0.45	1.4	[0.9-2.2]	0.09
	Length of stay in French Guiana (years in tercile)
	<8.0	1 (Ref.)
	8.0-21.9	1.0	[0.7-1.3]	0.80	-	-	-
	≥ 22.0	0.9	[0.6-1.2]	0.43	-	-	-
	NK	0.9	[0.5-1.8]	0.87	-	-	-
	Household localisation
	Urban	0.8	[0.6-1.1]	0.12	-	-	-
	Rural	1 (Ref.)
	Universal health insurance
	Yes	1.0	[0.7-1.4]	0.98	-	-	-
	No	1 (Ref.)
	NK	1.0	[0.5-2.0]	0.95	-	-	-
	Education level
	Before high school	0.9	[0.7-1.2]	0.38	-	-	-
	Over high school	1 (Ref.)
	NK	2.1	[1.1-4.0]	0.03	-	-	-
	Social Support if needed
	Yes	0.7	[0.6-0.9]	<0.01	0.7	[0.6-0.9]	<0.01
	No	1 (Ref.)			1 (Ref.)
	Maternal self esteem (score in tercile)
	Low (<30)	1.5	[1.2-1.9]	<0.01	1.5	[1.2-1.9]	<0.01
	Medium or high (31-40)	1 (Ref.)			1 (Ref.)
	NK	1.6	[1.1-2.4]	0.02	1.3	[0.9-1.7]	0.07
	Preconception BMI (kg/m²)
	<24.9	1 (Ref.)
	25.0-29.9	0.9	[0.6-1.2]	0.38	-	-	-
	≥ 30.0	1.0	[0.8-1.4]	0.72	-	-	-
	NK	1.1	[0.8-1.5]	0.60	-	-	-
	All-5 indicator
	Not all 5 food groups	1 (Ref.)
	All 5 food groups	0.7	[0.5-1.1]	0.1	-	-	-
	NK	0.7	[0.4-1.1]	0.13	-	-	-
	Single-parent family
	Yes	1.4	[1.1-1.8]	<0.01	1.4	1.1-1.7	<0.01
	No	1 (Ref.)			1 (Ref.)
	NK	0.9	[0.5-1.5]	0.61	0.9	0.5-1.5	0.70
	Electricity and running water at home
	Without	1.3	[1.0-1.6]	0.03	1.3	1.0-1.6	0.04
	With	1 (Ref.)			1 (Ref.)
	At least 1 member with a declared source of income
	Yes	0.7	[0.5-0.9]	<0.01	0.7	0.5-0.8	<0.01
	No	1 (Ref.)			1 (Ref.)
